# Supplementary material for: Application of a dynamic colonic gastrointestinal digestion model to red wines: a study of flavanol metabolism by the gut microbiota and the cardioprotective activity of microbial metabolites
Source: Royal Society of Chemistry journal article supplement (doi:10.1039/d4fo03774j), 2024-11-26
Supplement: d4fo03774j4.pdf [file d4fo03774j4.pdf]

## Supplementary Material Tables

### Application of dynamic colonic gastrointestinal digestion model to high-flavanol red wines: kinetics of colonic flavanol metabolism, gut microbiota transformation and cardioprotective effects

**Table S1.** Optimized MRM conditions for analysing the (poly)phenolic compounds determined in the different samples.

**Table S2.** Concentration of the main (wine precursors) and their colonic metabolites quantified in the ascending colon section (AC) during the digestion of wine 2020.

**Table S3.** Concentration of the main (wine precursors) and their colonic metabolites quantified in transversal colon section (TC) during digestion of 2020 wine.

**Table S4.** Concentration of the main (wine precursors) and their colonic metabolites quantified in descending colon section (DC) during digestion of 2020 wine.

**Table S5.** Concentration of the main (wine precursors) and their colonic metabolites quantified in ascending colon section (AC) during digestion of 2021 wine.

**Table S6.** Concentration of the main (wine precursors) and their colonic metabolites quantified in transversal colon section (TC) during digestion of 2021 wine.

**Table S7.** Concentration of the main (wine precursors) and their colonic metabolites quantified in descending colon section (DC) during digestion of 2021 wine.

**Table S1.** Optimized MRM conditions for analysing the (poly)phenolic compounds determined in the different samples.

| <u>Compound</u>                         | <u>RT<br/>(min)</u> | <u>MRM transitions for quantification</u> |           |           |            |           |            | <u>MRM transitions for identification</u> |           |           |            |           |            | <u>Standart used to quantify</u>        |
|-----------------------------------------|---------------------|-------------------------------------------|-----------|-----------|------------|-----------|------------|-------------------------------------------|-----------|-----------|------------|-----------|------------|-----------------------------------------|
|                                         |                     | <u>Q1 / Q3</u>                            | <u>DP</u> | <u>EP</u> | <u>CEP</u> | <u>CE</u> | <u>CXP</u> | <u>Q1 / Q3</u>                            | <u>DP</u> | <u>EP</u> | <u>CEP</u> | <u>CE</u> | <u>CXP</u> |                                         |
| Catechin                                | 4.80                | 288.9 / 108.9                             | -40       | -10       | -22        | -50       | -2         | 288.9 / 122.7                             | -40       | -10       | -28        | -50       | -2         | Catechin                                |
| Epicatechin                             | 6.60                | 288.9 / 108.9                             | -40       | -10       | -22        | -50       | -2         | 288.9 / 122.7                             | -40       | -10       | -22        | -50       | -2         | Epicatechin                             |
| Gallic acid                             | 3.10                | 305.0 / 125.0                             | -40       | -10       | -23        | -50       | -2         | 305.0 / 109.1                             | -40       | -10       | -23        | -50       | -2         | Gallic acid                             |
| Epigallocatechin                        | 4.30                | 305.0 / 125.0                             | -40       | -10       | -23        | -50       | -2         | 305.0 / 109.1                             | -40       | -10       | -23        | -50       | -2         | Epicatechin                             |
| Epigallocatechin gallate                | 5.30                | 457.0 / 169.0                             | -40       | -10       | -29        | -50       | -2         | 457.0 / 125.0                             | -40       | -10       | -29        | -50       | -2         | Epicatechin                             |
| Procyanidin B1                          | 4.20                | 577.1 / 124.9                             | -70       | -10       | -26        | -50       | -2         | 577.2 / 289.2                             | -70       | -10       | -33        | -34       | -4         | Procyanidin B1                          |
| Procyanidin B2                          | 6.00                | 577.1 / 124.9                             | -70       | -10       | -33        | -50       | -2         | 577.2 / 289.2                             | -70       | -10       | -33        | -34       | -4         | Procyanidin B2                          |
| Procyanidin B3                          | 7.60                | 577.1 / 124.9                             | -70       | -10       | -33        | -50       | -2         | 577.2 / 289.2                             | -70       | -10       | -33        | -34       | -4         | Procyanidin B1                          |
| Procyanidin T                           | 5.60                | 577.1 / 124.9                             | -70       | -10       | -33        | -50       | -2         | 577.1 / 289.2                             | -70       | -10       | -33        | -34       | -4         | Procyanidin B1                          |
| <i>trans</i> -Coumaric acid             | 7.20                | 162.9 / 119.0                             | -20       | -10       | -14        | -12       | -2         | 162.9 / 92.8                              | -20       | -10       | -18        | -38       | -2         | <i>trans</i> -Coumaric acid             |
| <i>cis</i> -Coumaric acid               | 7.80                | 162.9 / 119.0                             | -20       | -10       | -14        | -12       | -2         | 162.9 / 92.8                              | -20       | -10       | -18        | -38       | -2         | <i>trans</i> -Coumaric acid             |
| Benzoic acid                            | 9.00                | 121.0 / 77.0                              | -35       | -9        | -16        | -22       | 0          | 121.0 / 64.9                              | -35       | -9        | -16        | -42       | 0          | 4-Hydroxybenzoic acid                   |
| 3-Hydroxybenzoic acid                   | 5.40                | 137.0 / 93.0                              | -35       | -9        | -17        | -22       | 0          | 137.0 / 64.9                              | -35       | -9        | -17        | -42       | 0          | 4-Hydroxybenzoic acid                   |
| 4-Hydroxybenzoic acid                   | 4.10                | 137.0 / 93.0                              | -35       | -9        | -17        | -22       | 0          | 137.0 / 64.9                              | -35       | -9        | -17        | -42       | 0          | 4-Hydroxybenzoic acid                   |
| Protocatechuic acid                     | 3.20                | 153.0 / 107.6                             | -35       | -10       | -17        | -38       | -1         | 153.0 / 109.0                             | -35       | -10       | -17        | -20       | -2         | Protocatechuic acid                     |
| (3,4-Dihydroxybenzoic acid)             |                     |                                           |           |           |            |           |            |                                           |           |           |            |           |            |                                         |
| 3,5-Dihydroxybenzoic acid               | 3.00                | 152.9 / 109.0                             | -35       | -10       | -17        | -20       | -2         | 152.9 / 107.6                             | -35       | -10       | -17        | -38       | -1         | Protocatechuic acid                     |
| x,x-Dihydroxybenzoic acid               | 3.70                | 152.9 / 109.0                             | -35       | -10       | -17        | -20       | -2         | 152.9 / 107.6                             | -35       | -10       | -17        | -38       | -1         | Protocatechuic acid                     |
| x,y-Dihydroxybenzoic acid               | 4.10                | 152.9 / 109.0                             | -35       | -10       | -17        | -20       | -2         | 152.9 / 107.6                             | -35       | -10       | -17        | -38       | -1         | Protocatechuic acid                     |
| x,z-Dihydroxybenzoic acid               | 5.20                | 152.9 / 109.0                             | -35       | -10       | -17        | -20       | -2         | 152.9 / 107.6                             | -35       | -10       | -17        | -38       | -1         | Protocatechuic acid                     |
| Gallic acid                             | 2.20                | 168.9 / 124.9                             | -40       | -4        | -18        | -16       | 0          | 168.9 / 79.0                              | -40       | -4        | -18        | -34       | 0          | Gallic acid                             |
| Phenylacetic acid                       | 9.20                | 135.0 / 91.0                              | -30       | -9        | -17        | -12       | -2         | 135.0 / 107.0                             | -30       | -9        | -17        | -24       | -2         | 4-Hydroxyphenylacetic acid              |
| 2-Hydroxyphenylacetic acid              | 6.40                | 151.0 / 106.9                             | -30       | -9        | -17        | -15       | -2         | 151.0 / 64.7                              | -30       | -9        | -17        | -28       | -2         | 4-Hydroxyphenylacetic acid              |
| 3-Hydroxyphenylacetic acid              | 5.80                | 151.0 / 106.9                             | -30       | -9        | -17        | -15       | -2         | 151.0 / 64.7                              | -30       | -9        | -17        | -28       | -2         | 4-Hydroxyphenylacetic acid              |
| 4-Hydroxyphenylacetic acid              | 4.90                | 151.0 / 106.9                             | -30       | -9        | -17        | -15       | -2         | 151.0 / 64.7                              | -30       | -9        | -17        | -28       | -2         | 4-Hydroxyphenylacetic acid              |
| 3,4-Dihydroxyphenylacetic acid          | 3.70                | 167.0 / 123.0                             | -30       | -10       | -18        | -15       | -4         | 167.0 / 95.0                              | -30       | -10       | -18        | -26       | -2         | 3,4-Dihydroxyphenylacetic acid          |
| Hippuric acid                           | 5.00                | 178.0 / 134.0                             | -40       | -10       | -18        | -15       | -2         | 178.0 / 77.0                              | -40       | -10       | -18        | -20       | 0          | Hippuric acid                           |
| Phenylpropionic acid                    | 11.8                | 149.0 / 105.0                             | -45       | -7        | -17        | -13       | -2         | 149.0 / 77.0                              | -45       | -7        | -17        | -32       | -2         | 3-Phenylpropionic acid                  |
| 3-(3'-Hydroxyphenyl)propionic acid      | 7.70                | 164.8 / 121.2                             | -65       | -10       | -18        | -14       | -4         | 164.8 / 105.8                             | -65       | -10       | -18        | -32       | -2         | 3-(3'-Hydroxyphenyl)propionic acid      |
| 3-(4'-Hydroxyphenyl)propionic acid      | 7.30                | 164.8 / 119.1                             | -65       | -10       | -18        | -37       | -2         | 164.8 / 121.2                             | -65       | -10       | -18        | -14       | -4         | 3-(3'-Hydroxyphenyl)propionic acid      |
| 3-(3',4'-Dihydroxyphenyl)propionic acid | 5.00                | 181.0 / 59.0                              | -55       | -9        | -18        | -16       | -2         | 181.0 / 137.0                             | -55       | -9        | -18        | -14       | 0          | 3-(3',4'-Dihydroxyphenyl)propionic acid |

|  |                                                                     |      |               |     |     |     |     |    |               |     |     |     |     |    | acid                                      |
|--|---------------------------------------------------------------------|------|---------------|-----|-----|-----|-----|----|---------------|-----|-----|-----|-----|----|-------------------------------------------|
|  | Catechol                                                            | 3.80 | 109.0 / 91.0  | -60 | -10 | -16 | -35 | -1 | 109.0 / 81.0  | -60 | -10 | -16 | -24 | 0  | Catechol                                  |
|  | Pyrogallol                                                          | 2.10 | 125.0 / 79.0  | -45 | -10 | -16 | -27 | -2 | 125.0 / 81.0  | -45 | -10 | -16 | -26 | -2 | Pyrogallol                                |
|  | 4-Hydroxy-5-(3',4'-dihydroxyphenyl)-valeric acid                    | 4.50 | 225.0 / 163.0 | -70 | -10 | -20 | -20 | -2 | 225.0 / 181.0 | -70 | -10 | -20 | -35 | -2 | 4,4-Bis-4-hydroxyphenylvaleric acid       |
|  | 4-Hydroxy-5-(4'-hydroxyphenyl)-valeric acid                         | 6.90 | 209.0 / 147.0 | -70 | -10 | -20 | -15 | -2 | 209.0 / 165.0 | -70 | -10 | -20 | -15 | -2 | 4,4-Bis-4-hydroxyphenylvaleric acid       |
|  | 4-Hydroxy-5-(3'-hydroxyphenyl)-valeric acid                         | 8.30 | 209.0 / 147.0 | -70 | -10 | -20 | -15 | -2 | 209.0 / 165.0 | -70 | -10 | -20 | -15 | -2 | 4,4-Bis-4-hydroxyphenylvaleric acid       |
|  | 4-Hydroxy-5-(2'-hydroxyphenyl)-valeric acid                         | 10.3 | 209.0 / 147.0 | -70 | -10 | -20 | -15 | -2 | 209.0 / 165.0 | -70 | -10 | -20 | -15 | -2 | 4,4-Bis-4-hydroxyphenylvaleric acid       |
|  | 5-(3'-Hydroxyphenyl)-valeric acid                                   | 11.7 | 193.0 / 165.0 | -70 | -10 | -19 | -20 | -2 | 193.0 / 149.0 | -70 | -10 | -19 | -25 | -2 | 4,4-Bis-4-hydroxyphenylvaleric acid       |
|  | 5-(4'-Hydroxyphenyl)-valeric acid                                   | 9.30 | 193.0 / 165.0 | -70 | -10 | -19 | -20 | -2 | 193.0 / 149.0 | -70 | -10 | -19 | -25 | -2 | 4,4-Bis-4-hydroxyphenylvaleric acid       |
|  | 5-(3',4'-Dihydroxyphenyl)-valeric acid                              | 9.80 | 209.0 / 135.0 | -75 | -6  | -20 | -28 | -4 | 209.0 / 122.0 | -75 | -6  | -20 | -25 | -3 | 4,4-Bis-4-hydroxyphenylvaleric acid       |
|  | Phenyl-valeric acid                                                 | 13.7 | 177.0 / 133.0 | -55 | -7  | -18 | -25 | -2 | 177.0 / 77.0  | -55 | -7  | -18 | -40 | -2 | 4,4-Bis-4-hydroxyphenylvaleric acid       |
|  | 5-(3'-Hydroxyphenyl)-γ-valerolactone                                | 9.40 | 191.0 / 147.0 | -75 | -8  | -19 | -17 | -3 | 191.0 / 106.0 | -75 | -8  | -19 | -30 | -3 | 5-(3',4'-Dihydroxyphenyl)-δ-valerolactone |
|  | 5-(4'-Hydroxyphenyl)-γ-valerolactone                                | 8.40 | 191.0 / 147.0 | -75 | -8  | -19 | -17 | -3 | 191.0 / 106.0 | -75 | -8  | -19 | -30 | -3 | 5-(3',4'-Dihydroxyphenyl)-δ-valerolactone |
|  | 5-(3',4'-Dihydroxyphenyl)-γ-valerolactone                           | 6.70 | 207.0 / 163.0 | -75 | -8  | -19 | -20 | -3 | 207.0 / 122.0 | -75 | -8  | -19 | -25 | -3 | 5-(3',4'-Dihydroxyphenyl)-δ-valerolactone |
|  | 1-(3',4'-Dihydroxyphenyl)-3-(2',4',6'-trihydroxyphenyl)-propan-2-ol | 6.70 | 291.0 / 122.0 | -60 | -10 | -22 | -35 | -2 | 291.0 / 247.0 | -60 | -10 | -22 | -25 | -2 | Catechin                                  |
|  | 1-(4'-Hydroxyphenyl)-3-(2',4',6'-trihydroxyphenyl)-propan-2-ol      | 6.00 | 275.0 / 231.0 | -40 | -10 | -22 | -20 | -2 | 275.0 / 106.0 | -40 | -10 | -22 | -35 | -2 | Catechin                                  |
|  | 1-(3'-Hydroxyphenyl)-3-(2',4',6'-trihydroxyphenyl)-propan-2-ol      | 8.30 | 275.0 / 231.0 | -40 | -10 | -22 | -20 | -2 | 275.0 / 106.0 | -40 | -10 | -22 | -35 | -2 | Catechin                                  |
|  | 1-(2'-Hydroxyphenyl)-3-(2',4',6'-trihydroxyphenyl)-propan-2-ol      | 10.3 | 275.0 / 231.0 | -40 | -10 | -22 | -20 | -2 | 275.0 / 106.0 | -40 | -10 | -22 | -35 | -2 | Catechin                                  |

RT: Retention Time; DP: Declustering Potential; EP: Entrance Potential; CEP: Collision Cell Entrance Potential; CE: Collision Energy; CXP: Collision Cell Exit Potential

**Table S2.** Concentration of the main (wine precursors) and their colonic metabolites quantified in the gastric and intestinal digestates, and in the culture medium of the ascending colon section (AC) during the digestion of wine 2020.

| Compound (µg/mL media)                                         |                                                                     | Culture medium + wine | Gastric digestate | Intestinal digestate | AC day 12 | AC day 13 | AC day 14 | AC day 15 | AC day 16 | AC day 18 | AC day 20 | AC day 23 | AC day 26 |
|----------------------------------------------------------------|---------------------------------------------------------------------|-----------------------|-------------------|----------------------|-----------|-----------|-----------|-----------|-----------|-----------|-----------|-----------|-----------|
| PRECURSORS                                                     | Catechin                                                            | 4.18                  | 3.02              | n.d.                 | n.d.      | 0.60      | 0.85      | 0.84      | 0.94      | 0.91      | 0.90      | 1.05      | 0.82      |
|                                                                | Epicatechin                                                         | 2.13                  | 1.50              | n.d.                 | 0.03      | 0.33      | 0.49      | 0.52      | 0.53      | 0.54      | 0.57      | 0.62      | 0.51      |
|                                                                | Galocatechin                                                        | 0.74                  | 0.52              | n.d.                 | n.d.      | n.d.      | n.d.      | n.d.      | 0.02      | 0.01      | 0.07      | 0.08      | 0.02      |
|                                                                | Epigallocatechin                                                    | 0.80                  | 0.54              | n.d.                 | n.d.      | 0.05      | 0.09      | 0.07      | 0.11      | 0.09      | 0.13      | 0.16      | 0.12      |
|                                                                | Procyanidin B1                                                      | 7.72                  | 4.62              | n.d.                 | n.d.      | 0.81      | 1.31      | 1.35      | 1.60      | 1.71      | 1.71      | 1.77      | 1.35      |
|                                                                | Procyanidin B2                                                      | 1.89                  | 1.20              | n.d.                 | 0.05      | 0.21      | 0.29      | 0.33      | 0.37      | 0.40      | 0.40      | 0.44      | 0.33      |
|                                                                | Procyanidin B3                                                      | 0.52                  | 0.42              | n.d.                 | n.d.      | 0.16      | 0.19      | 0.18      | 0.19      | 0.20      | 0.20      | 0.20      | 0.18      |
|                                                                | Procyanidin T                                                       | 0.02                  | 0.01              | n.d.                 | n.d.      | n.d.      | n.d.      | n.d.      | 0.01      | n.d.      | n.d.      | n.d.      | n.d.      |
| METABOLITES                                                    | trans-Coumaric acid                                                 | 0.49                  | 0.40              | 1.52                 | 0.01      | 0.45      | 0.18      | 0.15      | 0.11      | 0.16      | 0.14      | 0.10      | 0.17      |
|                                                                | cis-Coumaric acid                                                   | 0.01                  | n.d.              | n.d.                 | n.d.      | n.d.      | 0.02      | 0.02      | 0.03      | 0.05      | 0.06      | 0.08      | 0.08      |
|                                                                | Benzoic acid                                                        | n.d.                  | n.d.              | n.d.                 | n.d.      | n.d.      | n.d.      | n.d.      | n.d.      | n.d.      | n.d.      | n.d.      | n.d.      |
|                                                                | 3-Hydroxybenzoic acid                                               | n.d.                  | n.d.              | n.d.                 | n.d.      | n.d.      | n.d.      | n.d.      | n.d.      | n.d.      | n.d.      | n.d.      | n.d.      |
|                                                                | 4-Hydroxybenzoic acid                                               | 0.40                  | 0.33              | 0.30                 | 0.17      | 0.23      | 0.29      | 0.29      | 0.30      | 0.25      | 0.19      | 0.23      | 0.22      |
|                                                                | Protocatechuic acid                                                 | 1.26                  | 1.15              | 0.96                 | 0.09      | 0.14      | 0.05      | 0.04      | 0.04      | 0.05      | 0.05      | 0.06      | 0.08      |
|                                                                | 3,5-Dihydroxybenzoic acid                                           | n.d.                  | n.d.              | n.d.                 | n.d.      | n.d.      | n.d.      | n.d.      | n.d.      | n.d.      | n.d.      | n.d.      | n.d.      |
|                                                                | x,x-Dihydroxybenzoic acid                                           | n.d.                  | n.d.              | 0.01                 | n.d.      | n.d.      | n.d.      | 0.01      | 0.01      | 0.02      | 0.02      | 0.03      | 0.03      |
|                                                                | x,y-Dihydroxybenzoic acid                                           | 0.06                  | 0.05              | 0.02                 | n.d.      | 0.01      | 0.02      | 0.02      | 0.03      | 0.05      | 0.05      | 0.08      | 0.08      |
|                                                                | x,z-Dihydroxybenzoic acid                                           | 0.04                  | 0.03              | 0.24                 | 0.02      | 0.04      | 0.05      | 0.05      | 0.08      | 0.16      | 0.14      | 0.15      | 0.26      |
|                                                                | Gallic acid                                                         | 10.1                  | 9.38              | n.d.                 | n.d.      | 1.93      | 2.08      | 1.74      | 1.85      | 1.80      | 1.85      | 2.10      | 1.76      |
|                                                                | Phenylacetic acid                                                   | n.d.                  | n.d.              | 0.20                 | 0.04      | 0.09      | 0.12      | 0.13      | 0.19      | 0.18      | 0.12      | 0.23      | 0.24      |
|                                                                | 2-Hydroxyphenylacetic acid                                          | 0.17                  | 0.08              | 0.13                 | 0.11      | 0.13      | 0.13      | 0.19      | 0.20      | 0.20      | 0.19      | 0.21      | 0.29      |
|                                                                | 3-Hydroxyphenylacetic acid                                          | n.d.                  | n.d.              | n.d.                 | n.d.      | n.d.      | n.d.      | n.d.      | n.d.      | n.d.      | n.d.      | n.d.      | n.d.      |
|                                                                | 4-Hydroxyphenylacetic acid                                          | n.d.                  | n.d.              | 0.15                 | 0.08      | 0.12      | 0.09      | 0.08      | 0.11      | 0.15      | 0.08      | 0.12      | 0.18      |
|                                                                | 3,4-Dihydroxyphenylacetic acid                                      | n.d.                  | n.d.              | n.d.                 | n.d.      | n.d.      | n.d.      | n.d.      | n.d.      | n.d.      | n.d.      | n.d.      | n.d.      |
|                                                                | Hippuric acid                                                       | n.d.                  | n.d.              | 0.05                 | 0.18      | 0.07      | 0.04      | 0.03      | 0.04      | 0.03      | n.d.      | n.d.      | n.d.      |
|                                                                | Phenylpropionic acid                                                | n.d.                  | n.d.              | n.d.                 | n.d.      | n.d.      | n.d.      | n.d.      | n.d.      | n.d.      | n.d.      | n.d.      | n.d.      |
|                                                                | 3-(3'-Hydroxyphenyl)propionic acid                                  | n.d.                  | n.d.              | n.d.                 | n.d.      | n.d.      | n.d.      | n.d.      | n.d.      | n.d.      | n.d.      | n.d.      | n.d.      |
|                                                                | 3-(4'-Hydroxyphenyl)propionic acid                                  | 0.20                  | 0.18              | 0.21                 | 1.18      | 1.18      | 1.16      | 1.37      | 1.55      | 1.66      | 1.59      | 1.96      | 2.12      |
|                                                                | 3-(3',4'-Dihydroxyphenyl)propionic acid                             | 0.58                  | 0.51              | n.d.                 | 0.02      | 0.17      | 0.49      | 0.63      | 0.76      | 0.80      | 0.82      | 1.02      | 0.86      |
|                                                                | Catechol                                                            | n.d.                  | n.d.              | n.d.                 | 0.09      | 0.25      | 0.48      | 0.44      | 0.52      | 0.50      | 0.46      | 0.53      | 0.44      |
|                                                                | Pyrogallol                                                          | 4.26                  | 4.03              | n.d.                 | n.d.      | 0.98      | 1.74      | 1.99      | 2.31      | 2.36      | 2.14      | 2.34      | 1.88      |
|                                                                | 4-Hydroxy-5-(3',4'-dihydroxyphenyl)-valeric acid                    | n.d.                  | n.d.              | n.d.                 | n.d.      | n.d.      | n.d.      | n.d.      | n.d.      | n.d.      | n.d.      | n.d.      | n.d.      |
|                                                                | 4-Hydroxy-5-(4'-hydroxyphenyl)-valeric acid                         | n.d.                  | n.d.              | n.d.                 | n.d.      | n.d.      | n.d.      | n.d.      | n.d.      | n.d.      | n.d.      | n.d.      | n.d.      |
|                                                                | 4-Hydroxy-5-(3'-hydroxyphenyl)-valeric acid                         | n.d.                  | n.d.              | n.d.                 | n.d.      | n.d.      | n.d.      | n.d.      | n.d.      | n.d.      | n.d.      | n.d.      | n.d.      |
|                                                                | 5-(3'-Hydroxyphenyl)-valeric acid                                   | n.d.                  | n.d.              | n.d.                 | n.d.      | n.d.      | n.d.      | n.d.      | n.d.      | n.d.      | n.d.      | n.d.      | n.d.      |
|                                                                | 5-(3',4'-Dihydroxyphenyl)-valeric acid                              | n.d.                  | n.d.              | n.d.                 | n.d.      | n.d.      | n.d.      | n.d.      | n.d.      | n.d.      | n.d.      | n.d.      | n.d.      |
|                                                                | 5-(3'-Hydroxyphenyl)-γ-valerolactone                                | n.d.                  | n.d.              | n.d.                 | n.d.      | n.d.      | n.d.      | n.d.      | n.d.      | n.d.      | n.d.      | n.d.      | n.d.      |
|                                                                | 5-(4'-Hydroxyphenyl)-γ-valerolactone                                | n.d.                  | n.d.              | n.d.                 | n.d.      | n.d.      | n.d.      | n.d.      | n.d.      | n.d.      | n.d.      | n.d.      | n.d.      |
|                                                                | 5-(3',4'-Dihydroxyphenyl)-γ-valerolactone                           | n.d.                  | n.d.              | n.d.                 | n.d.      | n.d.      | n.d.      | n.d.      | n.d.      | n.d.      | n.d.      | n.d.      | n.d.      |
|                                                                | 1-(3',4'-Dihydroxyphenyl)-3-(2',4',6'-trihydroxyphenyl)-propan-2-ol | 0.06                  | n.d.              | n.d.                 | n.d.      | n.d.      | n.d.      | n.d.      | n.d.      | 0.04      | n.d.      | 0.09      | 0.04      |
| 1-(4'-Hydroxyphenyl)-3-(2',4',6'-trihydroxyphenyl)-propan-2-ol | n.d.                                                                | n.d.                  | n.d.              | n.d.                 | n.d.      | n.d.      | n.d.      | n.d.      | n.d.      | n.d.      | n.d.      | n.d.      | n.d.      |
| 1-(3'-Hydroxyphenyl)-3-(2',4',6'-trihydroxyphenyl)-propan-2-ol | n.d.                                                                | n.d.                  | n.d.              | n.d.                 | n.d.      | n.d.      | n.d.      | n.d.      | n.d.      | n.d.      | n.d.      | n.d.      | n.d.      |
| 1-(2'-Hydroxyphenyl)-3-(2',4',6'-trihydroxyphenyl)-propan-2-ol | n.d.                                                                | n.d.                  | n.d.              | n.d.                 | n.d.      | n.d.      | n.d.      | n.d.      | n.d.      | n.d.      | n.d.      | n.d.      | n.d.      |

**Table S3.** Concentration of the main (wine precursors) and their colonic metabolites quantified in the culture medium of the transversal colon section (TC) during digestion of 2020 wine.

| Compound (µg/mL culture medium)                                |                                                                     | TC<br>day 12 | TC<br>day 13 | TC<br>day 14 | TC<br>day 15 | TC<br>day 16 | TC<br>day 18 | TC<br>day 20 | TC<br>day 23 | TC<br>day 26 |
|----------------------------------------------------------------|---------------------------------------------------------------------|--------------|--------------|--------------|--------------|--------------|--------------|--------------|--------------|--------------|
| PRECURSORS                                                     | Catechin                                                            | n.d.         |
|                                                                | Epicatechin                                                         | n.d.         | 0.04         | 0.02         | n.d.         | n.d.         | n.d.         | n.d.         | 0.02         | n.d.         |
|                                                                | Gallocatechin                                                       | n.d.         |
|                                                                | Epigallocatechin                                                    | n.d.         | n.d.         | 0.04         | 0.03         | 0.02         | n.d.         | n.d.         | n.d.         | n.d.         |
|                                                                | Procyanidin B1                                                      | 0.14         | 0.57         | 0.24         | 0.21         | 0.22         | 0.20         | 0.21         | 0.24         | 0.18         |
|                                                                | Procyanidin B2                                                      | n.d.         | 0.06         | 0.02         | n.d.         | n.d.         | n.d.         | n.d.         | n.d.         | n.d.         |
|                                                                | Procyanidin B3                                                      | n.d.         |
|                                                                | Procyanidin T                                                       | n.d.         |
| METABOLITES                                                    | <i>trans</i> -Coumaric acid                                         | n.d.         | 0.10         | 0.18         | 0.20         | 0.25         | 0.29         | 0.31         | 0.23         | 0.21         |
|                                                                | <i>cis</i> -Coumaric acid                                           | n.d.         |
|                                                                | Benzoic acid                                                        | n.d.         |
|                                                                | 3-Hydroxybenzoic acid                                               | n.d.         |
|                                                                | 4-Hydroxybenzoic acid                                               | 0.18         | 0.26         | 0.28         | 0.19         | 0.18         | 0.13         | 0.25         | 0.30         | 0.14         |
|                                                                | Protocatechuic acid                                                 | 0.31         | 0.51         | 0.42         | 0.37         | 0.40         | 0.36         | 0.59         | 0.80         | 0.46         |
|                                                                | 3,5-Dihydroxybenzoic acid                                           | n.d.         | 0.01         | 0.01         | 0.02         | 0.02         | 0.01         | 0.01         | 0.01         | 0.01         |
|                                                                | x,x-Dihydroxybenzoic acid                                           | n.d.         |
|                                                                | x,y-Dihydroxybenzoic acid                                           | 0.03         | 0.05         | 0.09         | 0.09         | 0.09         | 0.10         | 0.10         | 0.08         | 0.07         |
|                                                                | x,z-Dihydroxybenzoic acid                                           | 0.03         | 0.05         | 0.08         | 0.09         | 0.10         | 0.22         | 0.32         | 0.37         | 0.46         |
|                                                                | Gallic acid                                                         | 0.02         | 0.97         | 1.34         | 0.68         | 0.67         | 0.36         | 0.65         | 0.25         | 0.17         |
|                                                                | Phenylacetic acid                                                   | 16.2         | 17.9         | 17.8         | 15.7         | 16.8         | 19.6         | 21.4         | 21.5         | 22.5         |
|                                                                | 2-Hydroxyphenylacetic acid                                          | 1.50         | 1.96         | 2.51         | 2.38         | 2.61         | 3.38         | 8.14         | 8.14         | 9.11         |
|                                                                | 3-Hydroxyphenylacetic acid                                          | 0.43         | 0.46         | 0.48         | 0.47         | 0.54         | 0.79         | 1.37         | 1.45         | 1.63         |
|                                                                | 4-Hydroxyphenylacetic acid                                          | 0.97         | 1.24         | 0.77         | 0.84         | 0.73         | 0.26         | n.d.         | 0.17         | 0.07         |
|                                                                | 3,4-Dihydroxyphenylacetic acid                                      | 0.16         | 0.35         | 0.55         | 0.59         | 0.65         | 0.60         | 0.74         | 1.00         | 0.72         |
|                                                                | Hippuric acid                                                       | n.d.         |
|                                                                | Phenylpropionic acid                                                | n.d.         |
|                                                                | 3-(3'-Hydroxyphenyl)propionic acid                                  | 0.44         | 0.65         | 1.45         | 2.13         | 2.88         | 4.07         | 5.28         | 4.98         | 5.23         |
|                                                                | 3-(4'-Hydroxyphenyl)propionic acid                                  | 1.57         | 1.46         | 1.76         | 2.04         | 1.94         | 1.87         | 1.95         | 1.79         | 1.78         |
|                                                                | 3-(3',4'-Dihydroxyphenyl)propionic acid                             | 0.16         | 1.04         | 1.72         | 1.45         | 1.20         | 0.21         | 0.15         | 0.05         | 0.03         |
|                                                                | Catechol                                                            | 0.31         | 0.59         | 1.08         | 1.20         | 1.28         | 0.83         | 0.94         | 1.41         | 1.46         |
|                                                                | Pyrogallol                                                          | n.d.         | 0.46         | 0.90         | 0.73         | 0.48         | 0.15         | 0.23         | 0.17         | 0.06         |
|                                                                | 4-Hydroxy-5-(3',4'-dihydroxyphenyl)-valeric acid                    | n.d.         | 0.11         | 0.09         | 0.09         | 0.02         | 0.19         | 0.21         | 0.23         | 0.13         |
|                                                                | 4-Hydroxy-5-(4'-hydroxyphenyl)-valeric acid                         | 0.02         | 0.04         | n.d.         | n.d.         | n.d.         | 0.07         | 0.22         | 0.16         | 0.13         |
|                                                                | 4-Hydroxy-5-(3'-hydroxyphenyl)-valeric acid                         | n.d.         | n.d.         | n.d.         | 0.06         | 0.08         | 0.04         | 0.04         | 0.02         | n.d.         |
|                                                                | 5-(3'-Hydroxyphenyl)-valeric acid                                   | 0.01         | 0.02         | 0.07         | 0.04         | 0.04         | 0.07         | 0.09         | 0.04         | 0.01         |
|                                                                | 5-(3',4'-Dihydroxyphenyl)-valeric acid                              | n.d.         | 0.06         | 0.58         | 0.86         | 0.77         | 0.09         | 0.06         | 0.04         | 0.01         |
|                                                                | 5-(3'-Hydroxyphenyl)-γ-valerolactone                                | n.d.         | n.d.         | n.d.         | n.d.         | n.d.         | 0.08         | 0.16         | 0.16         | 0.16         |
|                                                                | 5-(4'-Hydroxyphenyl)-γ-valerolactone                                | n.d.         | n.d.         | n.d.         | 0.01         | 0.01         | n.d.         | n.d.         | n.d.         | n.d.         |
|                                                                | 5-(3',4'-Dihydroxyphenyl)-γ-valerolactone                           | 0.07         | 0.59         | 1.31         | 1.29         | 0.99         | 1.91         | 1.61         | 2.41         | 1.98         |
|                                                                | 1-(3',4'-Dihydroxyphenyl)-3-(2',4',6'-trihydroxyphenyl)-propan-2-ol | n.d.         |
| 1-(4'-Hydroxyphenyl)-3-(2',4',6'-trihydroxyphenyl)-propan-2-ol | n.d.                                                                | n.d.         | n.d.         | n.d.         | n.d.         | n.d.         | n.d.         | n.d.         | n.d.         |              |
| 1-(3'-Hydroxyphenyl)-3-(2',4',6'-trihydroxyphenyl)-propan-2-ol | n.d.                                                                | n.d.         | n.d.         | n.d.         | n.d.         | n.d.         | n.d.         | n.d.         | n.d.         |              |
| 1-(2'-Hydroxyphenyl)-3-(2',4',6'-trihydroxyphenyl)-propan-2-ol | n.d.                                                                | n.d.         | n.d.         | n.d.         | n.d.         | n.d.         | n.d.         | n.d.         | n.d.         |              |



**Table S5.** Concentration of the main (wine precursors) and their colonic metabolites quantified in the gastric and intestinal digestates, and in the culture medium of the ascending colon

| Compound (µg/mL media) |                                                                     | Culture medium+wine | Gastric digestate | Intestinal digestate | AC day 12 | AC day 13 | AC day 14 | AC day 15 | AC day 16 | AC day 18 | AC day 20 | AC day 23 | AC day 26 |
|------------------------|---------------------------------------------------------------------|---------------------|-------------------|----------------------|-----------|-----------|-----------|-----------|-----------|-----------|-----------|-----------|-----------|
| PRECURSORS             | Catechin                                                            | 5.92                | 3.34              | 0.32                 | 0.11      | 1.13      | 1.17      | 1.11      | 1.20      | 1.33      | 1.12      | 1.11      | 0.78      |
|                        | Epicatechin                                                         | 2.51                | 1.35              | 0.09                 | 0.04      | 0.46      | 0.40      | 0.34      | 0.37      | 0.43      | 0.32      | 0.36      | 0.23      |
|                        | Gallocatechin                                                       | 1.30                | 0.78              | n.d.                 | n.d.      | 0.28      | 0.37      | 0.34      | 0.37      | 0.33      | 0.33      | 0.32      | 0.30      |
|                        | Epigallocatechin                                                    | 0.72                | 0.40              | n.d.                 | n.d.      | 0.09      | 0.13      | 0.12      | 0.13      | 0.09      | 0.11      | 0.13      | 0.09      |
|                        | Epigallocatechin gallate                                            | 0.04                | 0.07              | n.d.                 | n.d.      | 0.02      | 0.03      | 0.02      | 0.02      | 0.01      | 0.02      | 0.02      | 0.02      |
|                        | Procyanidin B1                                                      | 9.80                | 4.10              | 0.46                 | n.d.      | 1.37      | 2.03      | 2.02      | 1.69      | 1.33      | 1.85      | 2.26      | 1.79      |
|                        | Procyanidin B2                                                      | 2.43                | 1.21              | n.d.                 | 0.04      | 0.37      | 0.46      | 0.44      | 0.40      | 0.36      | 0.46      | 0.54      | 0.42      |
|                        | Procyanidin B3                                                      | 0.55                | 0.29              | n.d.                 | n.d.      | 0.07      | 0.08      | 0.08      | 0.07      | 0.07      | 0.08      | 0.07      | 0.06      |
|                        | Procyanidin T                                                       | 0.08                | 0.06              | n.d.                 | n.d.      | n.d.      | n.d.      | n.d.      | n.d.      | n.d.      | n.d.      | n.d.      | n.d.      |
| METABOLITES            | <i>trans</i> -Coumaric acid                                         | 0.99                | 0.86              | 2.16                 | n.d.      | 0.24      | 0.20      | 0.21      | 0.22      | 0.19      | 0.24      | 0.21      | 0.12      |
|                        | <i>cis</i> -Coumaric acid                                           | 0.05                | 0.05              | 0.03                 | n.d.      | 0.03      | n.d.      |
|                        | Benzoic acid                                                        | n.d.                | n.d.              | n.d.                 | n.d.      | n.d.      | n.d.      | n.d.      | n.d.      | n.d.      | n.d.      | n.d.      | n.d.      |
|                        | 3-Hydroxybenzoic acid                                               | n.d.                | n.d.              | n.d.                 | n.d.      | n.d.      | n.d.      | n.d.      | n.d.      | n.d.      | n.d.      | n.d.      | n.d.      |
|                        | 4-Hydroxybenzoic acid                                               | 0.27                | 0.22              | 0.22                 | 0.08      | 0.11      | 0.12      | 0.12      | 0.14      | 0.11      | 0.14      | 0.16      | 0.16      |
|                        | Protocatechuic acid                                                 | 1.02                | 0.90              | 1.00                 | 0.07      | 0.10      | 0.07      | 0.07      | 0.08      | 0.11      | 0.15      | 0.17      | 0.14      |
|                        | 3,5-Dihydroxybenzoic acid                                           | 1.55                | 1.50              | 1.72                 | 0.14      | 0.20      | 0.12      | 0.15      | 0.14      | 0.21      | 0.30      | 0.34      | 0.27      |
|                        | x,x-Dihydroxybenzoic acid                                           | 0.01                | 0.02              | 0.03                 | 0.02      | 0.02      | 0.02      | 0.02      | 0.02      | 0.02      | 0.02      | 0.02      | 0.05      |
|                        | x,y-Dihydroxybenzoic acid                                           | 0.12                | 0.10              | 0.06                 | 0.03      | 0.04      | 0.05      | 0.06      | 0.07      | 0.07      | 0.09      | 0.17      | 0.17      |
|                        | x,z-Dihydroxybenzoic acid                                           | 0.06                | 0.05              | 0.26                 | 0.16      | 0.16      | 0.20      | 0.22      | 0.21      | 0.23      | 0.24      | 0.22      | 0.26      |
|                        | Gallic acid                                                         | 14.0                | 13.4              | 0.19                 | n.d.      | 2.57      | 3.04      | 3.04      | 3.02      | 2.88      | 3.73      | 4.01      | 3.91      |
|                        | Phenylacetic acid                                                   | n.d.                | n.d.              | n.d.                 | n.d.      | n.d.      | n.d.      | n.d.      | n.d.      | n.d.      | n.d.      | n.d.      | n.d.      |
|                        | 2-Hydroxyphenylacetic acid                                          | 1.56                | 1.50              | 1.03                 | 0.95      | 1.22      | 1.16      | 1.05      | 1.16      | 1.12      | 1.08      | 1.14      | 1.50      |
|                        | 3-Hydroxyphenylacetic acid                                          | n.d.                | n.d.              | n.d.                 | n.d.      | n.d.      | n.d.      | n.d.      | n.d.      | n.d.      | n.d.      | n.d.      | n.d.      |
|                        | 4-Hydroxyphenylacetic acid                                          | n.d.                | n.d.              | n.d.                 | n.d.      | n.d.      | n.d.      | n.d.      | n.d.      | n.d.      | n.d.      | 0.19      | 0.20      |
|                        | 3,4-Dihydroxyphenylacetic acid                                      | n.d.                | n.d.              | n.d.                 | n.d.      | n.d.      | n.d.      | n.d.      | n.d.      | n.d.      | n.d.      | n.d.      | n.d.      |
|                        | Hippuric acid                                                       | n.d.                | n.d.              | 0.10                 | 0.03      | 0.01      | 0.00      | 0.01      | 0.02      | 0.02      | 0.04      | 0.07      | 0.04      |
|                        | Phenylpropionic acid                                                | n.d.                | n.d.              | n.d.                 | n.d.      | n.d.      | n.d.      | n.d.      | n.d.      | n.d.      | n.d.      | n.d.      | n.d.      |
|                        | 3-(3'-Hydroxyphenyl)propionic acid                                  | n.d.                | n.d.              | n.d.                 | n.d.      | n.d.      | n.d.      | n.d.      | n.d.      | n.d.      | n.d.      | n.d.      | n.d.      |
|                        | 3-(4'-Hydroxyphenyl)propionic acid                                  | 0.71                | 0.54              | 0.52                 | 2.73      | 2.71      | 2.66      | 2.62      | 2.67      | 2.08      | 2.31      | 2.43      | 2.55      |
|                        | 3-(3',4'-Dihydroxyphenyl)propionic acid                             | 0.66                | 0.56              | 0.02                 | 0.16      | 1.87      | 2.72      | 2.99      | 3.18      | 3.19      | 3.56      | 3.45      | 3.62      |
|                        | Catechol                                                            | n.d.                | n.d.              | n.d.                 | 0.08      | 0.25      | 0.46      | 0.36      | 0.35      | 0.25      | 0.36      | 0.34      | 0.46      |
|                        | Pyrogallol                                                          | 7.31                | 6.97              | n.d.                 | n.d.      | 2.15      | 3.01      | 3.32      | 3.50      | 3.44      | 3.25      | 2.90      | 2.72      |
|                        | 4-Hydroxy-5-(3',4'-dihydroxyphenyl)-valeric acid                    | n.d.                | n.d.              | n.d.                 | n.d.      | n.d.      | n.d.      | n.d.      | n.d.      | n.d.      | n.d.      | n.d.      | n.d.      |
|                        | 4-Hydroxy-5-(4'-hydroxyphenyl)-valeric acid                         | n.d.                | n.d.              | n.d.                 | n.d.      | n.d.      | n.d.      | n.d.      | n.d.      | n.d.      | n.d.      | n.d.      | n.d.      |
|                        | 4-Hydroxy-5-(3'-hydroxyphenyl)-valeric acid                         | n.d.                | n.d.              | n.d.                 | n.d.      | n.d.      | n.d.      | n.d.      | n.d.      | n.d.      | n.d.      | n.d.      | n.d.      |
|                        | 4-Hydroxy-5-(2'-hydroxyphenyl)-valeric acid                         | n.d.                | n.d.              | n.d.                 | 0.12      | 0.11      | 0.10      | 0.10      | 0.10      | 0.10      | 0.11      | 0.12      | 0.13      |
|                        | 5-(3'-Hydroxyphenyl)-valeric acid                                   | n.d.                | n.d.              | n.d.                 | n.d.      | n.d.      | n.d.      | n.d.      | n.d.      | n.d.      | n.d.      | n.d.      | n.d.      |
|                        | 5-(4'-Hydroxyphenyl)-valeric acid                                   | n.d.                | n.d.              | n.d.                 | n.d.      | n.d.      | n.d.      | n.d.      | n.d.      | n.d.      | n.d.      | n.d.      | n.d.      |
|                        | 5-(3',4'-Dihydroxyphenyl)-valeric acid                              | n.d.                | n.d.              | n.d.                 | n.d.      | n.d.      | n.d.      | n.d.      | n.d.      | n.d.      | n.d.      | n.d.      | n.d.      |
|                        | Phenyl-valeric acid                                                 | n.d.                | n.d.              | n.d.                 | 0.13      | 0.13      | 0.14      | 0.11      | 0.14      | 0.05      | 0.07      | 0.05      | 0.08      |
|                        | 5-(3'-Hydroxyphenyl)-γ-valerolactone                                | n.d.                | n.d.              | n.d.                 | n.d.      | n.d.      | n.d.      | n.d.      | n.d.      | n.d.      | n.d.      | n.d.      | n.d.      |
|                        | 5-(4'-Hydroxyphenyl)-γ-valerolactone                                | n.d.                | n.d.              | n.d.                 | n.d.      | n.d.      | n.d.      | n.d.      | n.d.      | n.d.      | n.d.      | n.d.      | n.d.      |
|                        | 5-(3',4'-Dihydroxyphenyl)-γ-valerolactone                           | n.d.                | n.d.              | n.d.                 | n.d.      | n.d.      | n.d.      | n.d.      | n.d.      | n.d.      | n.d.      | n.d.      | 0.01      |
|                        | 1-(3',4'-Dihydroxyphenyl)-3-(2',4',6'-trihydroxyphenyl)-propan-2-ol | n.d.                | n.d.              | n.d.                 | n.d.      | n.d.      | 0.42      | 0.69      | 0.50      | 0.17      | 0.71      | 0.76      | 0.97      |
|                        | 1-(4'-Hydroxyphenyl)-3-(2',4',6'-trihydroxyphenyl)-propan-2-ol      | 0.19                | 0.15              | 0.11                 | 0.11      | 0.13      | 0.13      | 0.11      | 0.12      | 0.12      | 0.13      | 0.13      | 0.12      |
|                        | 1-(3'-Hydroxyphenyl)-3-(2',4',6'-trihydroxyphenyl)-propan-2-ol      | n.d.                | n.d.              | n.d.                 | n.d.      | n.d.      | n.d.      | n.d.      | n.d.      | n.d.      | n.d.      | n.d.      | n.d.      |
|                        | 1-(2'-Hydroxyphenyl)-3-(2',4',6'-trihydroxyphenyl)-propan-2-ol      | n.d.                | n.d.              | 0.09                 | 0.09      | 0.10      | 0.09      | 0.09      | 0.09      | 0.09      | 0.09      | 0.10      | 0.10      |

section (AC) during digestion of 2021 wine.





[illegible]



**Table S7.** Concentration of the main (wine precursors) and their colonic metabolites quantified in the culture medium descending colon section (DC) during digestion of 2021 wine.

| Compound (µg/mL media) |                                                                     | DC<br>day 12 | DC<br>day 13 | DC<br>day 14 | DC<br>day 15 | DC<br>day 16 | DC<br>day 18 | DC<br>day 20 | DC<br>day 23 | DC<br>day 26 |
|------------------------|---------------------------------------------------------------------|--------------|--------------|--------------|--------------|--------------|--------------|--------------|--------------|--------------|
| <b>PRECURSORS</b>      | Catechin                                                            | n.d.         |
|                        | Epicatechin                                                         | n.d.         |
|                        | Gallocatechin                                                       | n.d.         |
|                        | Epigallocatechin                                                    | n.d.         | 0.00         | 0.01         | 0.02         | 0.04         | 0.03         | 0.04         | 0.04         | 0.01         |
|                        | Epigallocatechin gallate                                            | n.d.         | n.d.         | n.d.         | 0.01         | 0.02         | 0.02         | 0.02         | 0.03         | 0.03         |
|                        | Procyanidin B1                                                      | n.d.         | 0.03         | 0.05         | 0.03         | 0.07         | n.d.         | n.d.         | n.d.         | n.d.         |
|                        | Procyanidin B2                                                      | n.d.         |
|                        | Procyanidin B3                                                      | n.d.         |
|                        | Procyanidin T                                                       | n.d.         |
| <b>METABOLITES</b>     | <i>trans</i> -Coumaric acid                                         | n.d.         | 0.01         | 0.03         | 0.09         | 0.11         | 0.09         | 0.05         | 0.03         | 0.04         |
|                        | <i>cis</i> -Coumaric acid                                           | n.d.         | n.d.         | n.d.         | 0.00         | 0.02         | 0.00         | n.d.         | n.d.         | n.d.         |
|                        | Benzoic acid                                                        | 0.00         | 0.00         | 0.00         | 0.00         | 0.00         | 0.00         | 0.00         | 0.00         | 0.00         |
|                        | 3-Hydroxybenzoic acid                                               | 0.00         | 0.00         | 0.06         | 0.09         | 0.11         | 0.12         | 0.24         | 0.25         | 0.26         |
|                        | 4-Hydroxybenzoic acid                                               | 0.25         | 0.25         | 0.35         | 0.27         | 0.34         | 0.61         | 0.65         | 0.40         | 0.27         |
|                        | Protocatechuic acid                                                 | 0.12         | 0.15         | 0.21         | 0.21         | 0.23         | 0.35         | 0.43         | 0.46         | 0.36         |
|                        | 3,5-Dihydroxybenzoic acid                                           | 0.27         | 0.34         | 0.51         | 0.48         | 0.54         | 0.77         | 0.95         | 1.04         | 0.79         |
|                        | x,x-Dihydroxybenzoic acid                                           | 0.01         | 0.01         | 0.01         | 0.02         | 0.02         | 0.02         | 0.01         | 0.01         | 0.02         |
|                        | x,y-Dihydroxybenzoic acid                                           | 0.03         | 0.05         | 0.04         | 0.05         | 0.06         | 0.04         | 0.04         | 0.04         | 0.05         |
|                        | x,z-Dihydroxybenzoic acid                                           | 0.22         | 0.28         | 0.31         | 0.27         | 0.26         | 0.35         | 0.45         | 0.50         | 0.51         |
|                        | Gallic acid                                                         | n.d.         | 0.11         | 0.02         | 0.04         | 0.44         | 0.04         | 0.04         | 0.04         | 0.04         |
|                        | Phenylacetic acid                                                   | 13.8         | 14.7         | 14.1         | 14.1         | 12.2         | 12.3         | 13.2         | 15.6         | 15.7         |
|                        | 2-Hydroxyphenylacetic acid                                          | 24.4         | 22.7         | 21.2         | 18.2         | 13.3         | 8.17         | 8.13         | 10.2         | 16.2         |
|                        | 3-Hydroxyphenylacetic acid                                          | 0.73         | 0.59         | 0.43         | 0.59         | 0.45         | 1.31         | 8.11         | 7.02         | 4.20         |
|                        | 4-Hydroxyphenylacetic acid                                          | 4.50         | 4.45         | 2.80         | 3.66         | 2.49         | 2.26         | 3.74         | 3.26         | 2.13         |
|                        | 3,4-Dihydroxyphenylacetic acid                                      | 0.27         | 0.76         | 1.51         | 2.68         | 3.33         | 4.14         | 3.02         | 1.84         | 1.82         |
|                        | Hippuric acid                                                       | n.d.         |
|                        | Phenylpropionic acid                                                | n.d.         |
|                        | 3-(3'-Hydroxyphenyl)propionic acid                                  | 0.37         | 0.60         | 1.89         | 4.26         | 7.13         | 12.5         | 13.0         | 16.9         | 17.9         |
|                        | 3-(4'-Hydroxyphenyl)propionic acid                                  | 1.49         | 1.22         | 1.35         | 1.21         | 1.26         | 1.26         | 1.26         | 1.93         | 0.80         |
|                        | 3-(3',4'-Dihydroxyphenyl)propionic acid                             | 0.01         | 0.10         | 0.20         | 0.37         | 0.52         | 0.23         | 0.22         | 0.22         | 0.17         |
|                        | Catechol                                                            | 0.07         | 0.09         | 0.29         | 0.51         | 0.70         | 0.92         | 0.75         | 0.95         | 1.20         |
|                        | Pyrogallol                                                          | n.d.         | 0.09         | n.d.         | n.d.         | 0.47         | n.d.         | n.d.         | n.d.         | n.d.         |
|                        | 4-Hydroxy-5-(3',4'-dihydroxyphenyl)-valeric acid                    | 0.02         | 0.09         | 0.16         | 0.25         | 0.25         | 0.27         | 0.20         | 0.16         | 0.30         |
|                        | 4-Hydroxy-5-(4'-hydroxyphenyl)-valeric acid                         | n.d.         | n.d.         | n.d.         | 0.03         | 0.07         | 0.10         | 0.13         | 0.12         | 0.07         |
|                        | 4-Hydroxy-5-(3'-hydroxyphenyl)-valeric acid                         | n.d.         |
|                        | 4-Hydroxy-5-(2'-hydroxyphenyl)-valeric acid                         | 0.25         | 0.18         | 0.18         | 0.16         | 0.15         | 0.15         | 0.14         | 0.15         | 0.18         |
|                        | 5-(3'-Hydroxyphenyl)-valeric acid                                   | n.d.         |
|                        | 5-(4'-Hydroxyphenyl)-valeric acid                                   | n.d.         |
|                        | 5-(3',4'-Dihydroxyphenyl)-valeric acid                              | n.d.         | 0.04         | 0.09         | 0.09         | 0.14         | 0.16         | 0.29         | 0.29         | 0.92         |
|                        | Phenyl-valeric acid                                                 | 0.05         | 0.04         | 0.03         | 0.02         | 0.02         | 0.02         | 0.02         | 0.01         | 0.02         |
|                        | 5-(3'-Hydroxyphenyl)-γ-valerolactone                                | n.d.         |
|                        | 5-(4'-Hydroxyphenyl)-γ-valerolactone                                | n.d.         | 0.01         | 0.03         |
|                        | 5-(3',4'-Dihydroxyphenyl)-γ-valerolactone                           | n.d.         | 0.10         | 0.85         | 1.83         | 4.20         | 7.45         | 7.55         | 8.05         | 4.72         |
|                        | 1-(3',4'-Dihydroxyphenyl)-3-(2',4',6'-trihydroxyphenyl)-propan-2-ol | n.d.         | 0.06         | 0.15         | n.d.         | 0.11         | n.d.         | n.d.         | 0.06         | n.d.         |

|                                                                |      |      |      |      |      |      |      |      |      |
|----------------------------------------------------------------|------|------|------|------|------|------|------|------|------|
| 1-(4'-Hydroxyphenyl)-3-(2',4',6'-trihydroxyphenyl)-propan-2-ol | n.d. | n.d. | n.d. | n.d. | n.d. | 0.05 | 0.06 | 0.10 | 0.06 |
| 1-(3'-Hydroxyphenyl)-3-(2',4',6'-trihydroxyphenyl)-propan-2-ol | n.d. |
| 1-(2'-Hydroxyphenyl)-3-(2',4',6'-trihydroxyphenyl)-propan-2-ol | 0.12 | 0.11 | 0.11 | 0.11 | 0.10 | 0.10 | 0.09 | 0.10 | 0.11 |

n.d.: not detected
